# Supplementary material
Source: PubMed Central journal article supplement (PMC2776410)
Supplement: 0904805106_0904805106SI.pdf [file 0904805106_0904805106SI.pdf]

# Supporting Information

Chen et al. 10.1073/pnas.0904805106

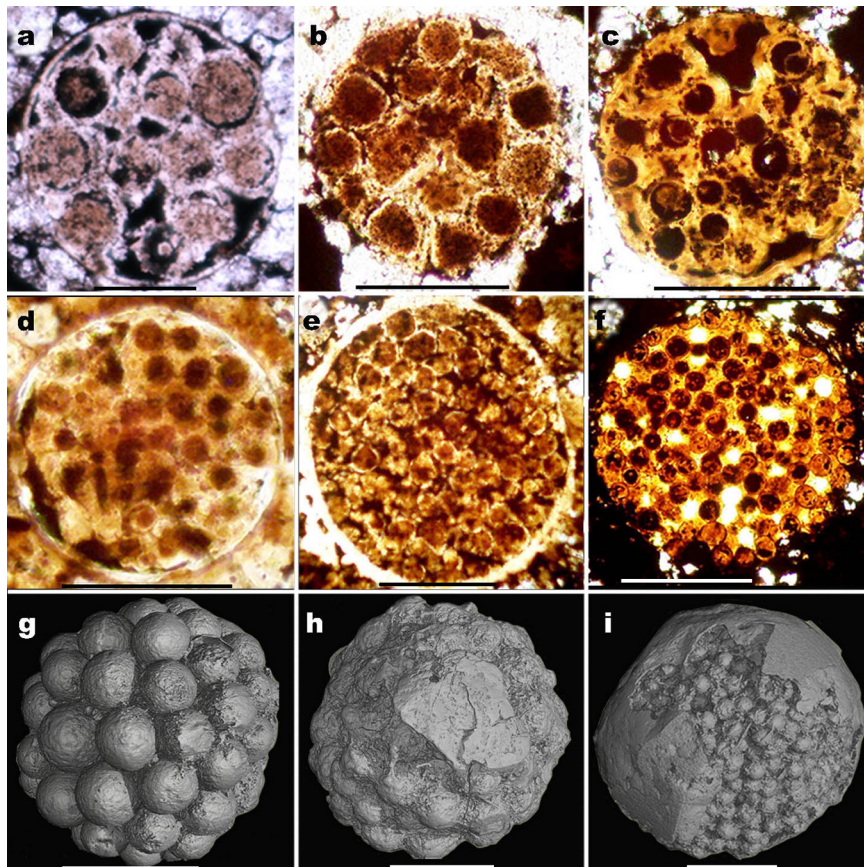

**Fig. S1.** Precambrian embryos at late embryonic stages from the Weng'an Phosphate Member of the Doushantou Formation. (a–f), optical images of thin section-embedded embryos at 64 cell (a), 128 cell (b, j01718c1), approximately 260 cell (c, 12765c1), approximately 1000 cell (d, 12462c1), approximately 2000 cell (e, 12776b1) and approximately 2600 cell (f, 11914b1) stages; (g–i), PPC-SR- $\mu$ CT digital external view of embryos at 64 cell (g, 03–4), 128 cell (h, 4c1), and approximately 2600 cell (i, 4F2) stages. [Scale bar, 150  $\mu$ m (a–d) and 250  $\mu$ m (e–i).]

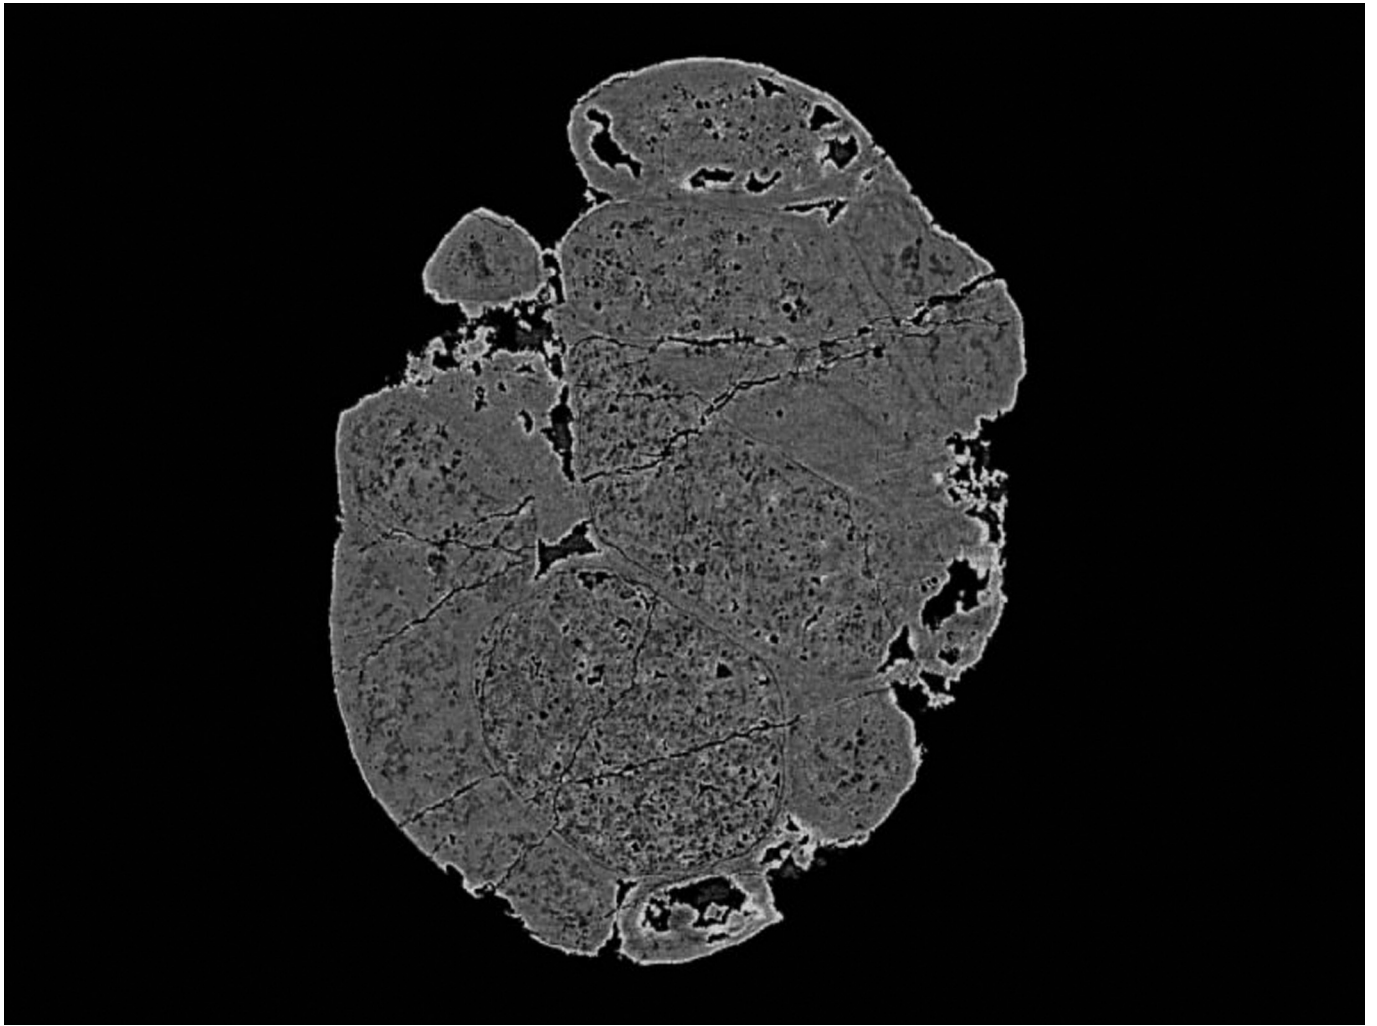

Movie S1. Showing internal structure of 4F10 by serial digital sections.

[Movie S1 \(AVI\)](#)

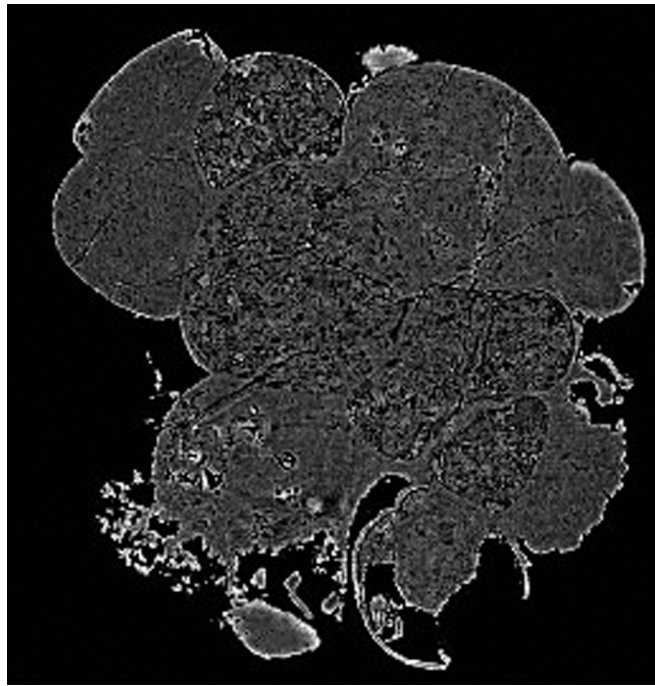

Movie S2. Showing internal structure of 4F4 by serial digital sections.

[Movie S2 \(AVI\)](#)

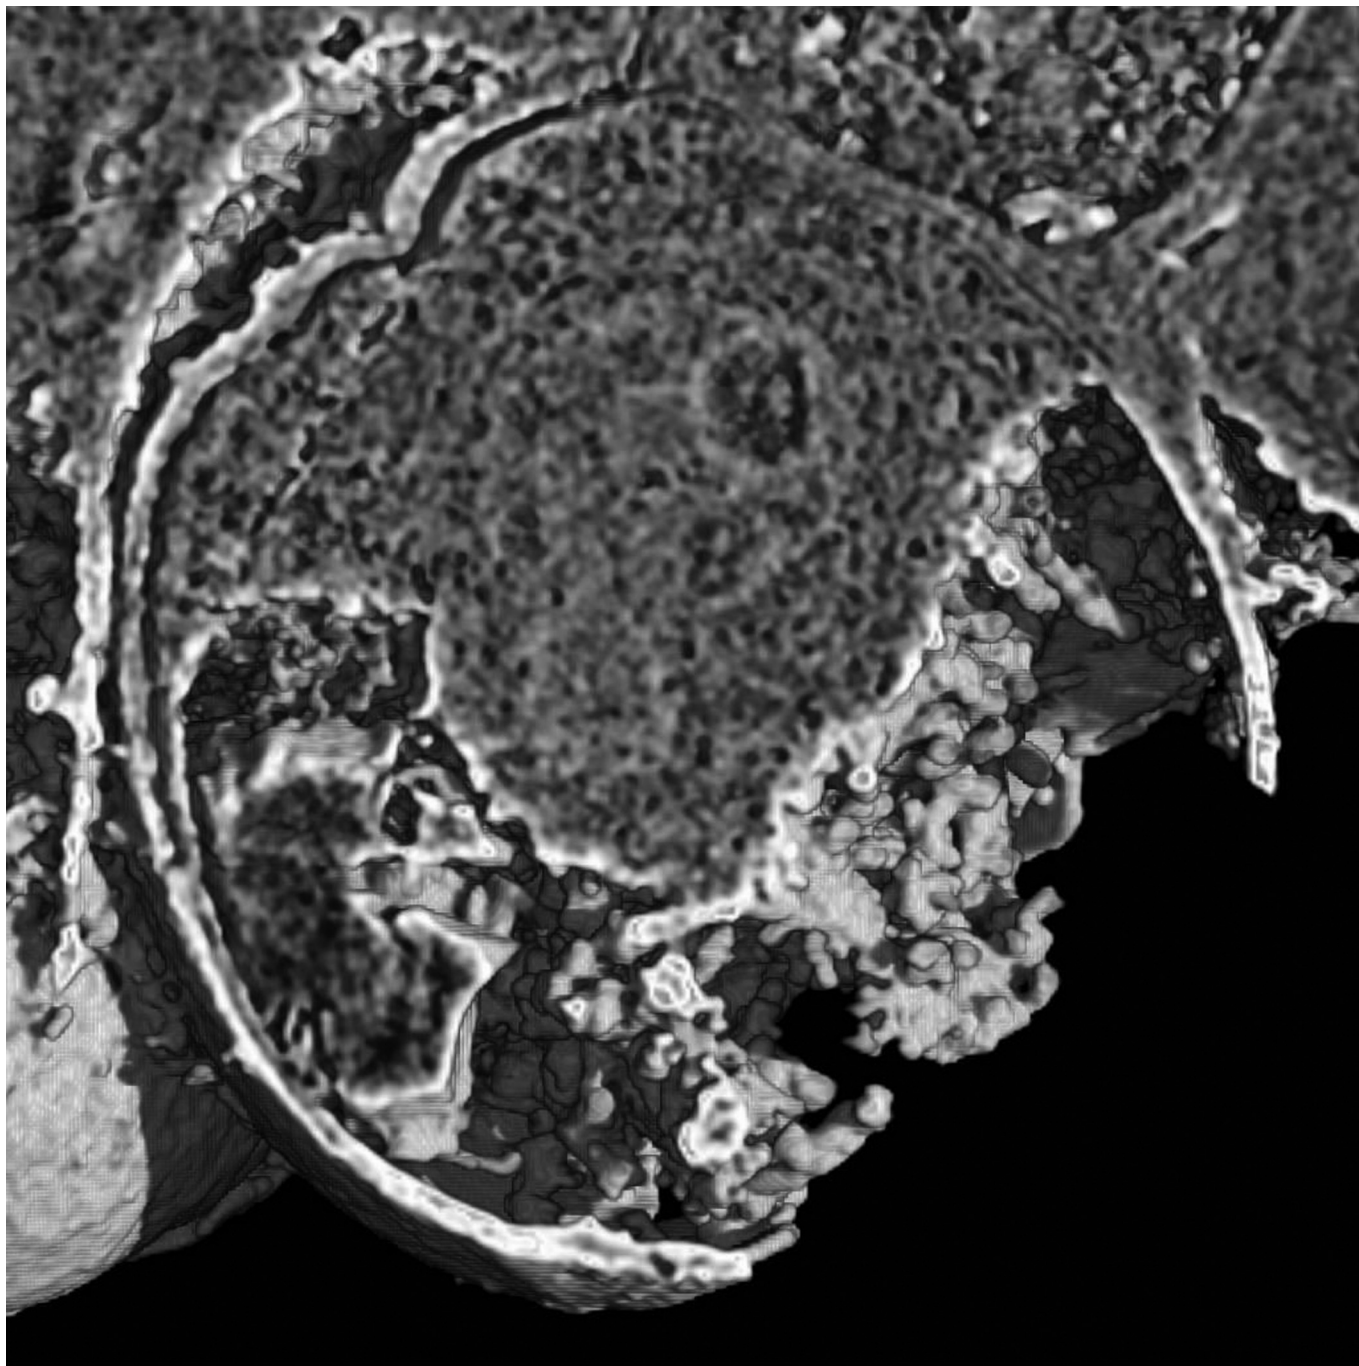

Movie S3. Showing nucleus and possible nucleolus within a cell of 4F4.

[Movie S3 \(AVI\)](#)
